# Supplementary material
Source: Research Square preprint supplement (doi:10.21203/rs.3.rs-8859110/v1)

## Supplementary information for blots

**Fig.1A : Expression profiles of SARS-CoV-2 nucleocapsid (N) and spike (S) proteins in Vero cells at different time points (2, 4, 6, 8, 12, 16, 20, and 24 hours) post-infection.**

Fig.1A-GAPDH

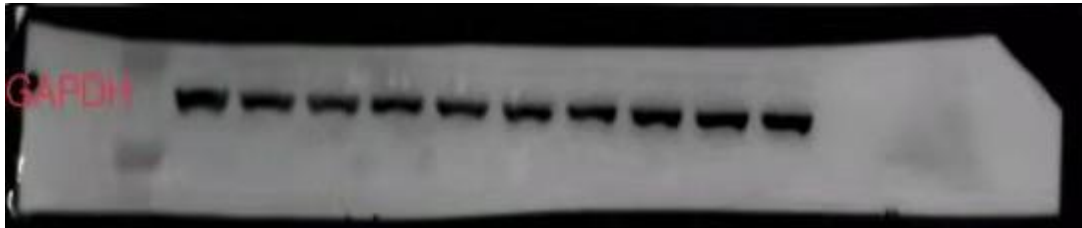

Fig.1A-N

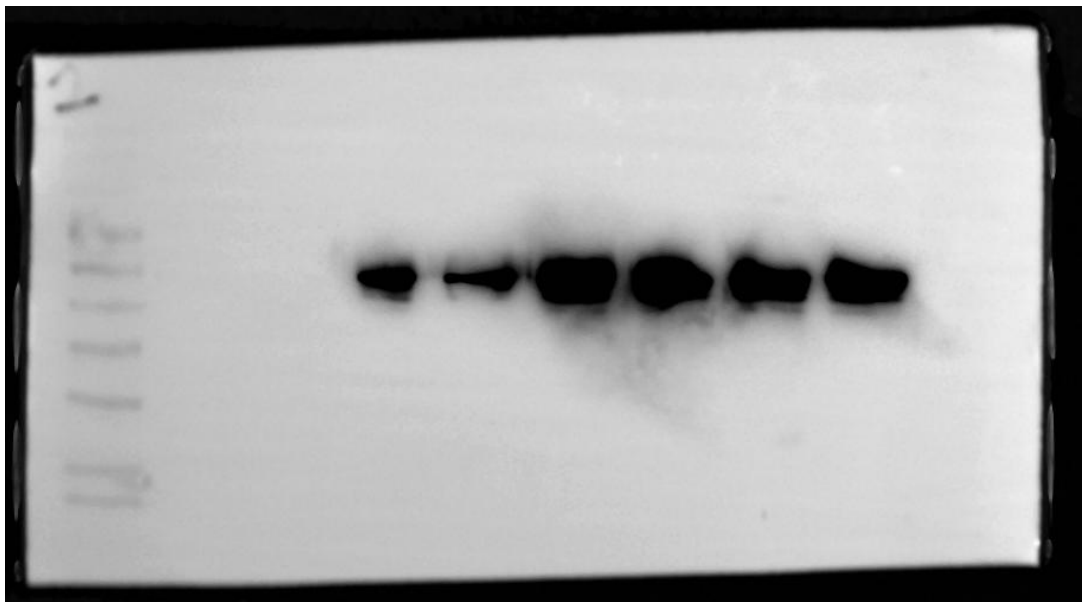

Fig.1A-S

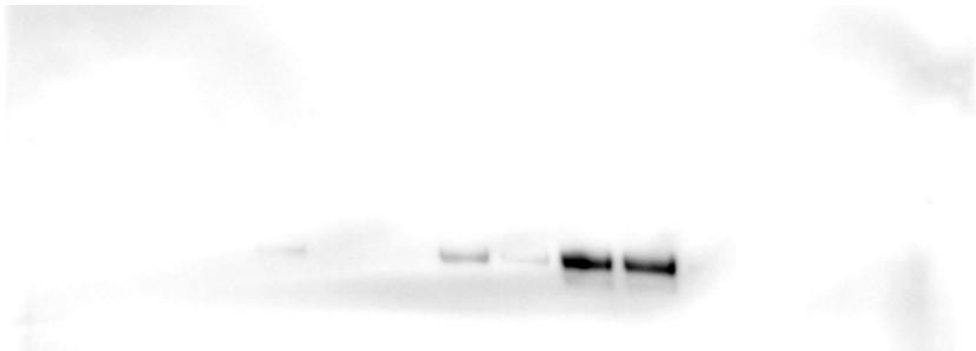

**Fig.3C: Immunoprecipitation (IP) assays were used to assess structural integrity.**

Fig.3C-N

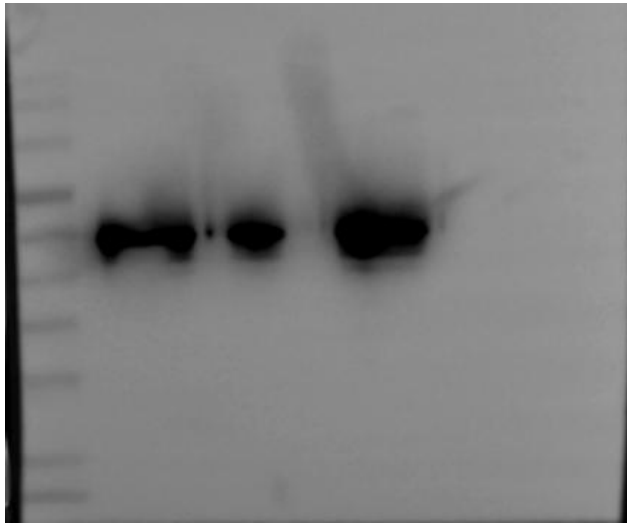

Fig.3C-S1

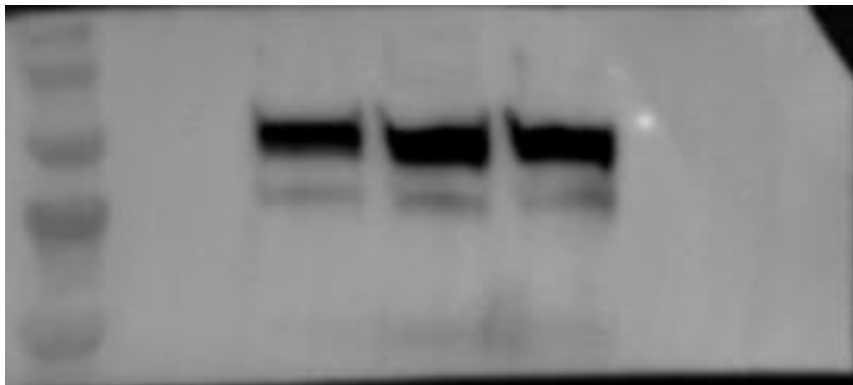

**Fig.4A: S1 protein expression was evaluated by Western blot analysis.**

Fig.4A-293T

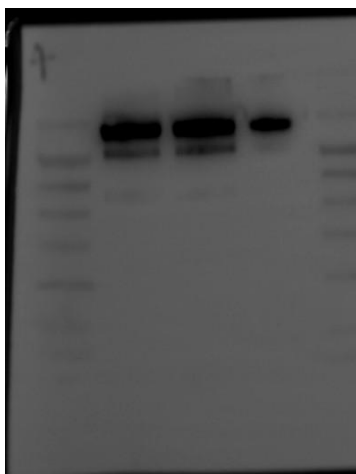

Fig.4A- Macrophages, DCs and 16HBE cells

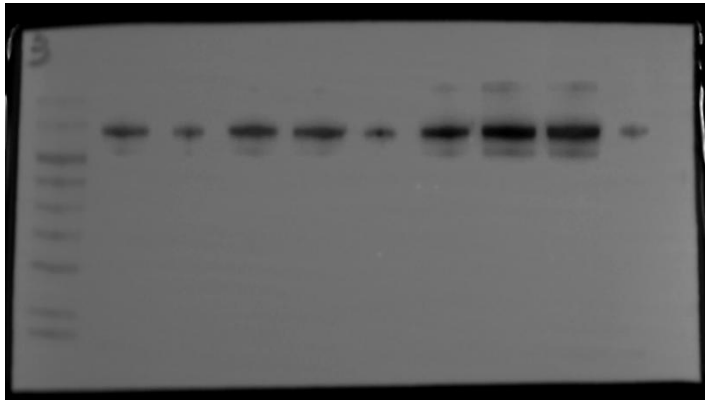

(**Note:** From left to right, every third lane corresponds to the blot expression of S1 in Macrophages, DCs, and 16HBE cells, respectively.)

**Fig.4B: Temporal detection (2 h, 6 h, 12 h, and 24 h) of the presence and expression of the N and S1 proteins after virion-mimetic particle transfection in different cell types.**

Fig.4B-(N) 16HBE, 293T

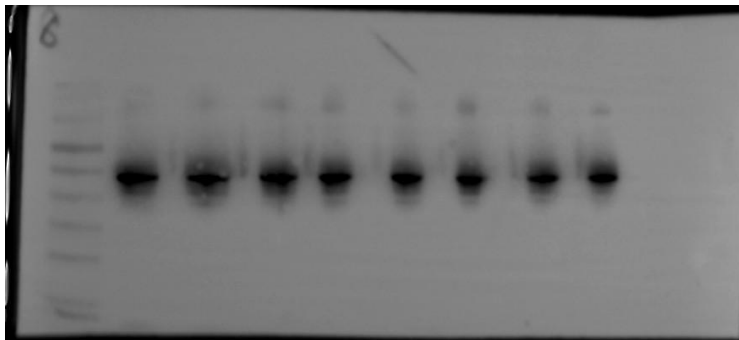

(**Note:** From left to right, every fourth lane corresponds to the blot expression of N at different time points in 16HBE, 293T respectively.)

Fig.4B-(N) Macrophage

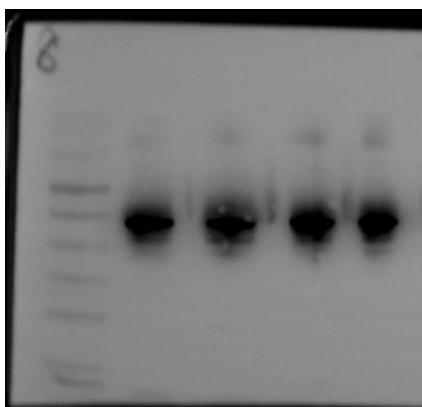

Fig.4B-(N) DCs

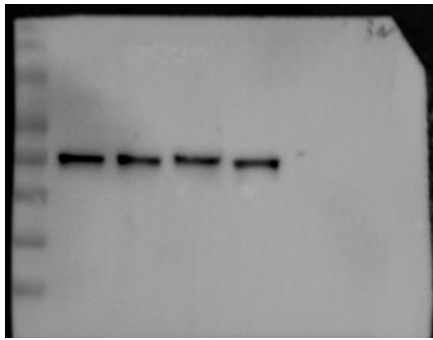

Fig.4B (S1)-Macrophage, 16HBE

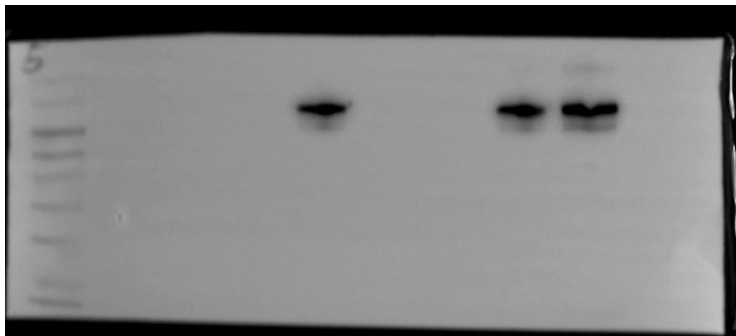

(**Note:** From left to right, every fourth lane corresponds to the blot expression of S1 at different time points in Macrophage, 16HBE respectively.)

Fig.4B (S1)-DCs

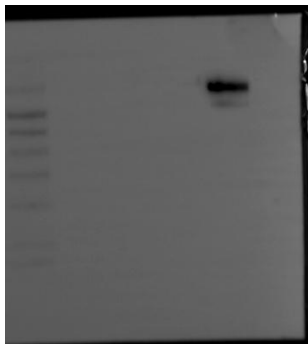

Fig.4B (S1)-293T

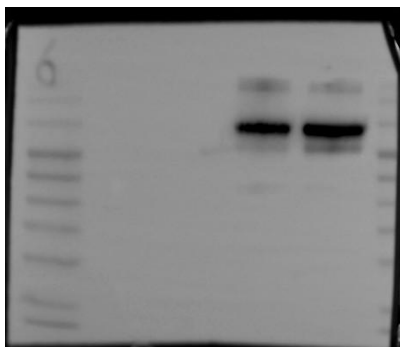

Supplement: Supplementary file 2 [file 8613b98974e7e267095dc6b7.pdf]
