# Supplementary material
Source: Research Square preprint supplement (doi:10.21203/rs.3.rs-8859110/v1)
Supplement: Supplementary file 1 [file 7dc1ec2ca6ae57063795459b.docx]

**Table.1 Physicochemical characteristics of the** **Virion-Mimetic Structural Vaccine**

| Characterization | Virion-Mimetic Structural Vaccine |
| --- | --- |
| Size (nm) | 95-110 |
| Zeta potentials (mV) | ≤15 |
| PDI | ≤0.2 |

**Table.2 Primers used for q-RT-PCR**

| Primer | Sequence(5'-3') |
| --- | --- |
| GAPDH-F | AGGTCGGTGTGAACGGATTTG |
| GAPDH-R | TGTAGACCATGTAGTTGAGGTCA |
| IFNα-F | CTTCCTCAGACTCATAACCT |
| IFNα-R | AGTCCTTCCTGTCCTTCA |
| IFNβ-F | GATGAACTCCACCAGCAGACAGTG |
| IFNβ-R | CACCATCCAGGCGTAGCTGTTG |
| TNFα-F | GCCAACGGCATGGATCTCAA |
| TNFα-R | TCTTGACGGCAGAGAGGAGG |
| IL-6-F | TAGTCCTTCCTACCCCAATTTCC |
| IL-6-R | TTGGTCCTTAGCCACTCCTTC |
| IL-12-F | CCTCCTGTGGGAGAAGCAGA |
| IL-12-R | CTTGAGCCTTTCAGGCGGAG |
| CXCL10-F | ATCATCCCTGCGAGCCTATCCT |
| CXCL10-R | GACCTTTTTTGGCTAAACGCTTTC |
| CCL21-F | GTGATGGAGGGGGTCAGGA |
| CCL21-R | GGGATGGGACAGCCTAAACT |
| MHCI-F | CCTACCAGAGAATGATTGGCTG |
| MHCI-R | GCAACTCATGCAGGTTGGC |
| MHCII-F | AGTGCGACGAGAACGGTAAC |
| MHCII-R | CGTTGGGGAACACACACCA |
| NFκB-F | ATGGCAGACGATGATCCCTAC |
| NFκB-R | TGTTGACAGTGGTATTTCTGGTG |
| CD40-F | TGTCATCTGTGAAAAGGTGGTC |
| CD40-R | ACTGGAGCAGCGGTGTTATG |
| IL-7-F | TTCCTCCACTGATCCTTGTTCT |
| IL-7-R | AGCAGCTTCCTTTGTATCATCAC |
| IL-21-F | GGACCCTTGTCTGTCTGGTAG |
| IL-21-R | TGTGGAGCTGATAGAAGTTCAGG |
| IL-33-F | TCCAACTCCAAGATTTCCCCG |
| IL-33-R | CATGCAGTAGACATGGCAGAA |
| LAT-F | GCAGCAAACTTGTAATGG |
| LAT-R | AGATGTGAGGGACAGGAG |
